# Supplementary material
Source: publisher figshare collection journal article supplement (https://acs.figshare.com/ndownloader/files/4632025)
Supplement: Supplementary file 1 [file 4632025]

## Supporting Information

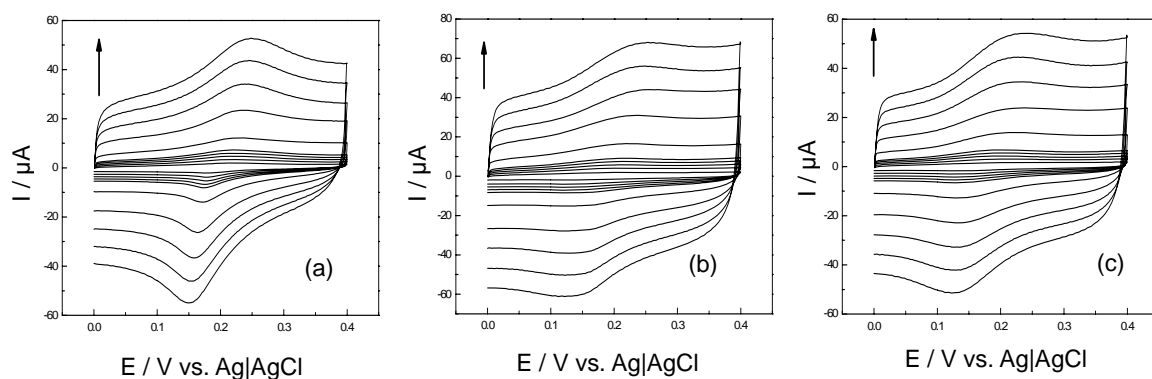

**Figure S1.** CVs of Au-NS/SOD (a), Au-NR/SOD (b), Au-NP/SOD (c) gold electrodes in 25 mM PBS (pH 7.2) at different scan rates: 10, 20, 30, 40, 50, 100, 200, 300, 400, 500  $\text{mV s}^{-1}$  (from the inner to the outer).

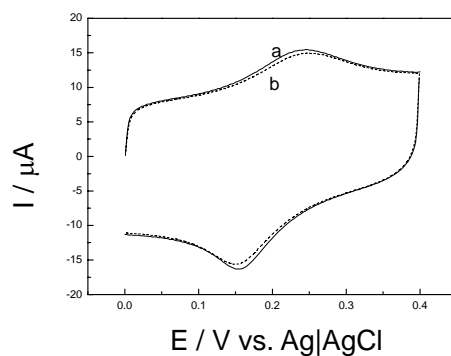

**Figure S2.** CVs obtained at Au-NS/SOD electrode (a) in 25 mM PBS (pH 7.2), and (b) after potentially scanned for one week. Potential scan rate: 100  $\text{mV s}^{-1}$ .

The direct immobilization of SOD molecules at the nanostructured gold electrodes is further verified by the measurement of the open-circuit potential ( $E_{oc}$ ) of gold nanostructures-immobilized electrodes in  $N_2$ -saturated 25 mM PBS. A 370 mV negative shift of  $E_{oc}$  (from +270 mV to -100 mV vs. Ag|AgCl) was observed when the Au-NS/SOD electrode was applied at a potential of -250 mV for 180 s. This negative shift of  $E_{oc}$  indicates that an electron is transferred to the redox center of the SOD (i.e., the  $Cu^{2+}$  moiety is converted into  $Cu^+$ ). Whereas, the  $E_{oc}$  was returned back to +270 mV when it was measured after holding the electrode at +600 mV for 180 s, indicating the oxidation of the  $Cu^+$  to  $Cu^{2+}$  again. Similar result was also obtained at the Au-NR/SOD and Au-NP/SOD gold electrodes. A controlled experiment was performed at the bare nanostructured gold electrodes by holding the electrode potential at -250 mV for 180 s and no obvious negative shift of the  $E_{oc}$  was observed. This behavior provides another evidence for the successful immobilization of the SOD at the three kinds of nanostructured gold surfaces.

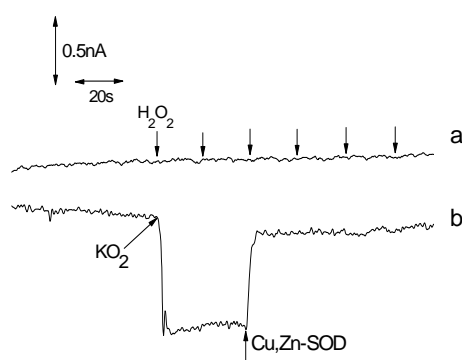

**Figure S3.** Typical current-time responses of Au-NS/SOD electrode toward 50  $\mu M$   $H_2O_2$  (curve a), and in the presence of 3  $\mu M$   $O_2^{\bullet-}$  (curve b) in 25 mM PBS at -300 mV. The arrows represent the addition of  $KO_2$  and 10  $\mu M$  Cu, Zn-SOD to the solution.
